# Supplementary material for: Mutation of Basic Residues R283, R286, and K288 in the Matrix Protein of Newcastle Disease Virus Attenuates Viral Replication and Pathogenicity
Source: MDPI journal article supplement (doi:10.3390/ijms24020980), 2023-01-04
Supplement: s1 [file s1]

# Supplementary Materials

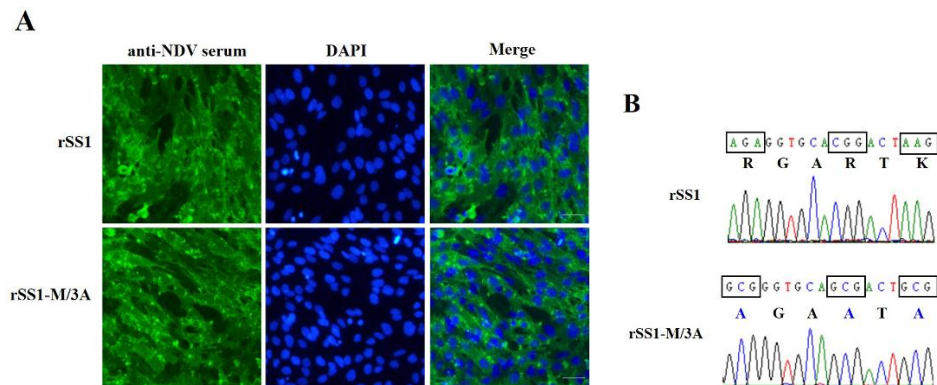

**Figure S1.** Identification of the rescued virus rSS1-M/3A by IFA and DNA sequencing. (A) Characterization of rSS1-M/3A in virus-infected DF-1 cells by IFA. (B) Nucleotide sequence analysis of the M/3A mutations introduced in the rSS1-M/3A M gene after serially passed five times in 10-day-old SPF chicken eggs.

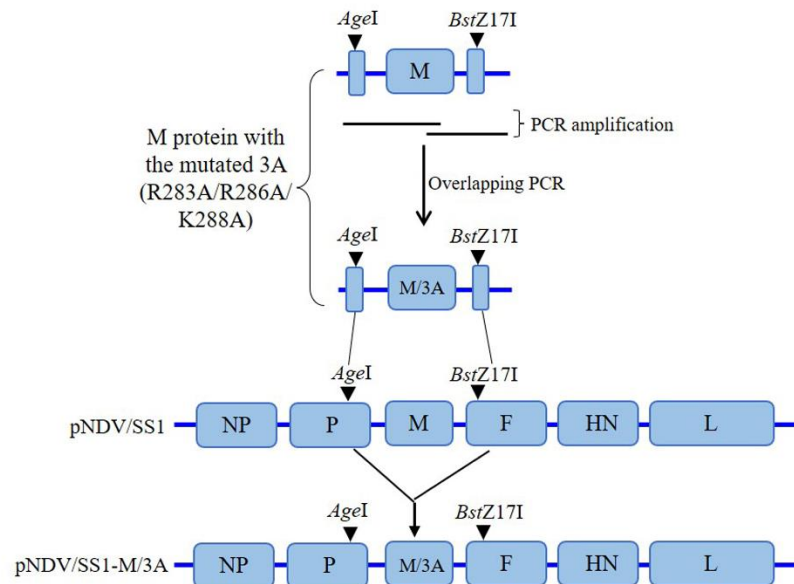

**Figure S2.** Schematic diagram of the mutation strategy for the construction of the full-length cDNA clone pNDV/SS1-M/3A.

**Table S1.** The information of primers used for the construction of recombinant plasmids.

| Plasmid            | Sense Primer (5'→3')                                                                                                                                                                            | Anti-Sense Primer (5'→3')                                                                                                                                                                       | Restriction Sites <sup>a</sup> |
|--------------------|-------------------------------------------------------------------------------------------------------------------------------------------------------------------------------------------------|-------------------------------------------------------------------------------------------------------------------------------------------------------------------------------------------------|--------------------------------|
| pCMV-HA-M(264-292) | <u>AATTC</u> GGCTCAATCTATCTGTTGG<br>GCTCAGTGATGTGCTCGGGCCCTC<br>TGTGCTTGTGAAGGCGAGAGGTG<br>CACGGACTAAGCTACTTGCTCCTT<br>C                                                                        | <u>TCGAG</u> AAGGAGCAAGTAGCTTAGTC<br>CGTGACCTCTCGCCTTCACAAGCA<br>CAGAGGGCCCCGAGCACATCACTGA<br>GCCCAACAGATAGATTGAGCCG                                                                            | <i>EcoR</i> I / <i>Xho</i> I   |
| pCMV-HA-M(289-313) | <u>AATTC</u> GGCTACTTGCTCCTTTCTTC<br>TCTAGCAGTGGGACAGCCTGCTA<br>TCCTATAGCAAATGCCTCTCCCCA<br>GGTTGCCAAGTC                                                                                        | <u>TCGAG</u> ACTTGGCAACCTGGGGAGAG<br>GCATTTGCTATAGGATAGCAGGCTG<br>TCCCACTGCTAGAGAAGAAAGGAG<br>CAAGTAGCCG                                                                                        | <i>EcoR</i> I / <i>Xho</i> I   |
| pCMV-HA-M(264-280) | <u>AATTC</u> GGCTCAATCTATCTGTTGG<br>GCTCAGTGATGTGCTCGGGCCCTC<br>TGTGCTTGTGTC                                                                                                                    | <u>TCGAG</u> ACACAAGCACAGAGGGCCC<br>GAGCACATCACTGAGCCCAACAGA<br>TAGATTGAGCCG                                                                                                                    | <i>EcoR</i> I / <i>Xho</i> I   |
| pCMV-HA-M(281-288) | <u>AATTC</u> GGAAGGCGAGAGGTGCAC<br>GGACTAAGTC                                                                                                                                                   | <u>TCGAG</u> ACTTAGTCCGTGCACCTCTCG<br>CCTTCCG                                                                                                                                                   | <i>EcoR</i> I / <i>Xho</i> I   |
| pCMV-HA-M/mt1      | <u>AATTC</u> GGCTCAATCTATCTGTTGG<br>GCTCAGTGATGTGCTCGGGCCCTC<br>TGTGCTTGTGGCGGCGAGAGGTG<br>CACGGACTAAGCTACTTGCTCCTT<br>TCTTCTCTAGCAGTGGGACAGCCT<br>GCTATCCTATAGCAAATGCCTCTC<br>CCCAGGTTGCCAAGTC | <u>TCGAG</u> ACTTGGCAACCTGGGGAGAG<br>GCATTTGCTATAGGATAGCAGGCTG<br>TCCCACTGCTAGAGAAGAAAGGAG<br>CAAGTAGCTTAGTCCGTGCACCTCT<br>CGCCGCCACAAGCACAGAGGGCCC<br>GAGCACATCACTGAGCCCAACAGA<br>TAGATTGAGCCG | <i>EcoR</i> I / <i>Xho</i> I   |
| pCMV-HA-M/mt2      | <u>AATTC</u> GGCTCAATCTATCTGTTGG<br>GCTCAGTGATGTGCTCGGGCCCTC<br>TGTGCTTGTGAAGGCGGCGGGTG<br>CACGGACTAAGCTACTTGCTCCTT<br>TCTTCTCTAGCAGTGGGACAGCCT<br>GCTATCCTATAGCAAATGCCTCTC<br>CCCAGGTTGCCAAGTC | <u>TCGAG</u> ACTTGGCAACCTGGGGAGAG<br>GCATTTGCTATAGGATAGCAGGCTG<br>TCCCACTGCTAGAGAAGAAAGGAG<br>CAAGTAGCTTAGTCCGTGCACCCGC<br>CGCCTTCACAAGCACAGAGGGCCC<br>GAGCACATCACTGAGCCCAACAGA<br>TAGATTGAGCCG | <i>EcoR</i> I / <i>Xho</i> I   |
| pCMV-HA-M/mt3      | <u>AATTC</u> GGCTCAATCTATCTGTTGG<br>GCTCAGTGATGTGCTCGGGCCCTC<br>TGTGCTTGTGAAGGCGAGAGCGG<br>CACGGACTAAGCTACTTGCTCCTT<br>TCTTCTCTAGCAGTGGGACAGCCT<br>GCTATCCTATAGCAAATGCCTCTC<br>CCCAGGTTGCCAAGTC | <u>TCGAG</u> ACTTGGCAACCTGGGGAGAG<br>GCATTTGCTATAGGATAGCAGGCTG<br>TCCCACTGCTAGAGAAGAAAGGAG<br>CAAGTAGCTTAGTCCGTGCCGCTCT<br>CGCCTTCACAAGCACAGAGGGCCC<br>GAGCACATCACTGAGCCCAACAGA<br>TAGATTGAGCCG | <i>EcoR</i> I / <i>Xho</i> I   |
| pCMV-HA-M/mt4      | <u>AATTC</u> GGCTCAATCTATCTGTTGG<br>GCTCAGTGATGTGCTCGGGCCCTC<br>TGTGCTTGTGAAGGCGAGAGGTG<br>CAGCGACTAAGCTACTTGCTCCTT<br>TCTTCTCTAGCAGTGGGACAGCCT<br>GCTATCCTATAGCAAATGCCTCTC<br>CCCAGGTTGCCAAGTC | <u>TCGAG</u> ACTTGGCAACCTGGGGAGAG<br>GCATTTGCTATAGGATAGCAGGCTG<br>TCCCACTGCTAGAGAAGAAAGGAG<br>CAAGTAGCTTAGTCCGTGCACCTCT<br>CGCCTTCACAAGCACAGAGGGCCC<br>GAGCACATCACTGAGCCCAACAGA<br>TAGATTGAGCCG | <i>EcoR</i> I / <i>Xho</i> I   |
| pCMV-HA-M/mt5      | <u>AATTC</u> GGCTCAATCTATCTGTTGG<br>GCTCAGTGATGTGCTCGGGCCCTC<br>TGTGCTTGTGAAGGCGAGAGGTG<br>CACGGGCGAAGCTACTTGCTCCTT<br>TCTTCTCTAGCAGTGGGACAGCCT<br>GCTATCCTATAGCAAATGCCTCTC<br>CCCAGGTTGCCAAGTC | <u>TCGAG</u> ACTTGGCAACCTGGGGAGAG<br>GCATTTGCTATAGGATAGCAGGCTG<br>TCCCACTGCTAGAGAAGAAAGGAG<br>CAAGTAGCTTCGCCCCTGCACCTCT<br>CGCCTTCACAAGCACAGAGGGCCC<br>GAGCACATCACTGAGCCCAACAGA<br>TAGATTGAGCCG | <i>EcoR</i> I / <i>Xho</i> I   |

|               |                                                                    |                       |
|---------------|--------------------------------------------------------------------|-----------------------|
| pCMV-HA-M/mt6 | <u>AATTC</u> GGCTCAATCTATCTGTTGG <u>TCGAG</u> ACTTGGCAACCTGGGGAGAG | <i>EcoR I /XhoI I</i> |
|               | GCTCAGTGATGTGCTCGGGCCCTC GCATTTGCTATAGGATAGCAGGCTG                 |                       |
|               | TGTGCTTGTGAAGGCGAGAGGTG TCCCACTGCTAGAGAAGAAAGGAG                   |                       |
|               | CACGGA CTGCGCTACTTGCTCCTT CAAGTAGCGCAGTCCGTGCACCTCT                |                       |
| pCMV-HA-M/mt7 | TCTTCTCTAGCAGTGGGACAGCCT CGCCTTCACAAGCACAGAGGGCCC                  | <i>EcoR I /XhoI I</i> |
|               | GCTATCCTATAGCAAATGCCTCTC GAGCACATCACTGAGCCCAACAGA                  |                       |
|               | CCCAGGTTGCCAAGTC TAGATTGAGCCG                                      |                       |
|               | <u>AATTC</u> GGCTCAATCTATCTGTTGG <u>TCGAG</u> ACTTGGCAACCTGGGGAGAG |                       |
| pCMV-HA-M/3A  | GCTCAGTGATGTGCTCGGGCCCTC GCATTTGCTATAGGATAGCAGGCTG                 | <i>EcoR I</i>         |
|               | TGTGCTTGTGAAGGCGGCGGGTG TCCCACTGCTAGAGAAGAAAGGAG                   |                       |
|               | CAGCGACTGCGCTACTTGCTCCTT CAAGTAGCGCAGTCGCTGCACCCGC                 |                       |
|               | TCTTCTCTAGCAGTGGGACAGCCT CGCCTTCACAAGCACAGAGGGCCC                  |                       |
| pNDV/SS1-M/3A | GCTATCCTATAGCAAATGCCTCTC GAGCACATCACTGAGCCCAACAGA                  | <i>XhoI I</i>         |
|               | CCCAGGTTGCCAAGTC TAGATTGAGCCG                                      |                       |
|               | TTGA <u>AATTC</u> GGATGGACTCATCCAG CGCAGTCGCTGCACCCGCCGCCTTC       |                       |
|               | GAC ACAAGCACAGAGGGCCC                                              |                       |
| pNDV/SS1-M/3A | AAGGCGGCGGGTGCAGCGACTGC GC <u>ACTTCGAG</u> TTATTTCTGAAAGG          | <i>Age I</i>          |
|               | GCTACTTGCTCCTTTCTTCTCTAGC                                          |                       |
|               | ACA <u>ACCGGT</u> GCAGCACCTTCTGA CGCAGTCGCTGCACCCGCCGCCTTC         |                       |
|               | ATTG ACAAGCACAGAGGGCCC                                             |                       |
|               | AAGGCGGCGGGTGCAGCGACTGC GTG <u>GATAC</u> ATTGACTGCCTTATCTC         | <i>BstZ17 I</i>       |
|               | GCTACTTGCTCCTTTCTTCTCTAGC CTG                                      |                       |

<sup>a</sup>: Restriction sites are given in italics and underlines.
